# Supplementary material for: A Mediterranean diet does not alter plasma trimethylamineN-oxide concentrations in healthy adults at risk for colon cancer
Source: Royal Society of Chemistry journal article supplement (doi:10.1039/c9fo00333a), 2019-01-01
Supplement: c9fo00333a1.pdf [file c9fo00333a1.pdf]

**Supplementary Information for**

***A Mediterranean diet does not alter plasma trimethylamine N-oxide concentrations in healthy adults at risk for colon cancer***

Laura E. Griffin<sup>1†</sup>, Zora Djuric<sup>2</sup>, Chris J. Angiletta<sup>3‡</sup>, Cassie Mitchell<sup>3</sup>, Mary E. Baugh<sup>3§</sup>, Kevin P. Davy<sup>3</sup>, Andrew P. Neilson<sup>1†\*</sup>

<sup>1</sup>Department of Food Science and Technology, Virginia Tech, Blacksburg, VA, USA

<sup>2</sup>Departments of Family Medicine and Nutritional Sciences, University of Michigan, Ann Arbor, MI, USA

<sup>3</sup>Department of Human Nutrition, Foods, and Exercise, Virginia Tech, Blacksburg, VA, USA

<sup>†</sup>Current affiliation: Plants for Human Health Institute, Department of Food, Bioprocessing and Nutrition Sciences, North Carolina State University, Kannapolis, NC

<sup>‡</sup>Current affiliation: Geriatric Education & Research Department, VA Medical Center, Salem, VA

<sup>§</sup>Section on Gerontology and Geriatric Medicine, Department of Internal Medicine, Wake Forest School of Medicine, Winston-Salem, NC

\*Corresponding author: Dr. Andrew Neilson, Plants for Human Health Institute, Department of Food, Bioprocessing and Nutrition Sciences, North Carolina State University, 600 Laureate Way, Kannapolis, NC 28081; Phone: 704-250-5495; Email: [aneilso@ncsu.edu](mailto:aneilso@ncsu.edu).

**SUPPLEMENTAL TABLES**

**Table S1.** Multi-reaction monitoring (MRM) settings for UPLC-MS/MS detection of analytes in plasma

| Compound                 | Retention time<br>(min) | MW<br>(g/mol) | Parent [M+H] <sup>+</sup><br>(m/z) | Daughter<br>(m/z) | Cone voltage<br>(V) | Collision energy<br>(eV) |
|--------------------------|-------------------------|---------------|------------------------------------|-------------------|---------------------|--------------------------|
| Carnitine                | 2.09                    | 161.20        | 162.26                             | 84.99             | 84.99               | 34                       |
| Carnitine-d <sub>9</sub> | 2.08                    | 170.25        | 171.28                             | 84.99             | 84.99               | 34                       |
| Betaine                  | 1.25                    | 117.15        | 118.24                             | 59.42             | 59                  | 44                       |
| γ-Butyrobetaine          | 0.98                    | 145.20        | 146.27                             | 87.00             | 26                  | 16                       |
| Betaine-d <sub>9</sub>   | 1.25                    | 126.14        | 127.30                             | 68.10             | 68                  | 46                       |
| Choline                  | 1.13                    | 103.16        | 104.20                             | 60.02             | 60                  | 38                       |
| Choline-d <sub>9</sub>   | 1.11                    | 112.16        | 113.32                             | 69.08             | 69                  | 40                       |
| TMAO                     | 2.01                    | 75.11         | 76.16                              | 58.91             | 59                  | 40                       |
| TMAO-d <sub>9</sub>      | 1.98                    | 84.12         | 85.22                              | 68.10             | 68                  | 40                       |

**Table S2. Demographic and dietary characteristics of subjects<sup>a</sup> at baseline classified based on median TMAO plasma concentration<sup>b</sup>**

| <b>Parameter<sup>c</sup></b>                 | <b>Healthy Eating, n=58</b> | <b>Mediterranean Diet, n=58</b> |
|----------------------------------------------|-----------------------------|---------------------------------|
| BMI <sup>d</sup> (kg/m <sup>2</sup> )        | 26.9 (3.6)                  | 27.4 (4.1)                      |
| Age (years)                                  | 49 (14)                     | 55 (10)                         |
| Caucasian                                    | 54 (93%)                    | 49 (85%)                        |
| Female                                       | 41 (71%)                    | 43 (74%)                        |
| Current smoker                               | 4 (7%)                      | 9 (16%)                         |
| College Graduate                             | 46 (79%)                    | 45 (78%)                        |
| Physical Activity, metabolic equivalents/day | 20 (15)                     | 19 (15)                         |
| Energy intake (kcal/day)                     | 2134 (646)                  | 1954 (446)                      |
| Fat (% of energy)                            | 34.3 (5.8)                  | 34.5 (6.5)                      |
| Protein (% of energy)                        | 15.8 (2.5)                  | 15.7 (2.8)                      |
| Animal Protein (% of energy)                 | 10.1 (2.9)                  | 9.7 (2.8)                       |
| Carbohydrate (% of energy)                   | 48.8 (6.5)                  | 49.4 (7.9)                      |
| Fruit and vegetables (servings/day)          | 4.6 (1.9)                   | 4.5 (1.7)                       |
| Fiber (g/1000 kcal)                          | 10.7 (3.5)                  | 11.4 (3.7)                      |
| Glycemic Index, bread reference              | 83.7 (5.4)                  | 83.8 (5.9)                      |

<sup>a</sup> Characteristics of 115 subjects at baseline

<sup>b</sup> Data shown are for subjects for whom TMAO plasma concentrations are available at either baseline or post-intervention

<sup>c</sup> Data are given as mean and (SD) or number and percent. None of the differences were statistically significant using either two-sample t-tests for continuous variables or Chi Square tests for categorical variables.

<sup>d</sup> BMI = body mass index

**Table S3.** Body weight and dietary characteristics of individuals who did or did not decrease in TMAO concentration post-intervention. Data shown is mean and SD except for number of participants assigned to the Mediterranean diet arm.

| Parameter                                                  | Decreased TMAO<br>(n=41) | Increased TMAO<br>(n=48) | P-value |
|------------------------------------------------------------|--------------------------|--------------------------|---------|
| Percent change TMAO                                        | -35% (26)                | 77 (77)                  | <0.001  |
| Mediterranean Diet Assignment, n (%)                       | 22 (53%)                 | 24 (50%)                 | 0.746   |
| Percent goals met                                          | 87% (22)                 | 82% (20)                 | 0.292   |
| Weight Change (lbs.)                                       | -2.3 (7.8)               | -0.34 (4.1)              | 0.162   |
| Percent weight change post-supplementation versus baseline | -1.18 (4.5)              | -0.049 (2.51)            | 0.155   |
| Change in Animal Protein intake, g/day                     | -5.5 (21.3)              | -1.5 (14.4)              | 0.297   |
| Change in red meat intake, servings/day                    | -1.58 (1.80)             | -0.98 (1.61)             | 0.099   |
| Change in fiber intake, g/1000 kcal                        | 5.9 (4.4)                | 4.4 (4.2)                | 0.098   |

**Table S4.** Baseline dietary intakes in study subjects who had TMAO plasma concentrations above or below the median (2.92  $\mu$ M) at baseline. Data shown is mean and SD or number and percent.

| Baseline Diet                             | Above Median, n=57 | Below Median, n=58 | P-Value <sup>a</sup> |
|-------------------------------------------|--------------------|--------------------|----------------------|
| Assigned to Mediterranean arm (number, %) | 29 (50%)           | 29 (51%)           | 0.925                |
| Energy intake (kcal/day)                  | 2134 (641)         | 1954 (453)         | 0.086                |
| Fat (% of energy)                         | 34.7 (5.6)         | 34.1 (6.6)         | 0.639                |
| Protein (% of energy)                     | 15.8 (2.9)         | 15.8 (2.7)         | 0.966                |
| Animal Protein (% of energy)              | 10.2 (2.8)         | 9.5 (3.0)          | 0.203                |
| Carbohydrate (% of energy)                | 48.1 (5.9)         | 47.6 (7.6)         | 0.744                |
| Fruit and vegetables (servings/day)       | 4.8 (2.0)          | 4.3 (1.6)          | 0.126                |
| Fish, Servings/day                        | 0.5 (1.0)          | 0.5 (0.4)          | 0.843                |
| Red meat, servings/day                    | 3.0 (1.9)          | 2.2 (1.8)          | 0.025                |
| Eggs, servings/day                        | 0.4 (0.5)          | 0.4 (0.4)          | 0.814                |
| Dairy, servings/day                       | 3.3 (2.0)          | 3.1 (1.9)          | 0.561                |
| Fiber (g/1000 kcal)                       | 10.7 (4.0)         | 11.5 (3.2)         | 0.259                |
| Glycemic Load, bread reference            | 203 (67)           | 180 (53)           | 0.042                |

<sup>a</sup>P-values are from independent samples t-tests (two-sided), from Chi square tests for categorical variables, or from Fisher's Exact test for current smoking. None are significant after corrections for multiple comparisons.

**Table S5.** Cytokine concentrations in 116 subjects with TMAO concentrations above or below the median at baseline. The median TMAO concentration was 2.92  $\mu\text{mol/L}$ . Data shown is mean and SD.

| Parameter    | Above Median*, n=57<br>(pg/mL) | Below Median*, n=58<br>(pg/mL) | P-Value |
|--------------|--------------------------------|--------------------------------|---------|
| IL-1 $\beta$ | 436 (1528)                     | 499 (1650)                     | 0.830   |
| IL-6         | 536 (1671)                     | 557 (1514)                     | 0.942   |
| IL-8         | 670 (3540)                     | 568 (3393)                     | 0.875   |
| TNF $\alpha$ | 884 (2714)                     | 717 (1863)                     | 0.700   |
| IL-4         | 415 (1112)                     | 370 (1027)                     | 0.821   |
| IL-10        | 1718 (6428)                    | 1642(5361)                     | 0.945   |
| IL-13        | 12973 (57741)                  | 11460 (45854)                  | 0.876   |
| INF $\gamma$ | 616 (2640)                     | 643 (3586)                     | 0.964   |
| CRP          | 2.31 (3.08)                    | 2.60 (3.24)                    | 0.631   |

\*Mean TMAO was 5.8  $\mu\text{mol/L}$  (SD 5.6) for subjects above the median and 2.0  $\mu\text{mol/L}$  (SD 0.6) for subjects below the median.

**Table S6.** Spearman correlations (rho) of serum measures with bacterial diversity measures at baseline, major phyla and ratios in colon biopsy tissues (n=86) at baseline. Starred coefficients had p<0.05 without adjustment for multiple comparisons.

| Bacterial populations in colonic biopsies | TMAO<br>μM    | Betaine<br>μM | Choline<br>μM | Carnitine<br>μM | γ-Butyrobetaine<br>μM | TMAO:<br>Betaine | TMAO:<br>Choline | TMAO:<br>Carnitine | TMAO:<br>γ-Butyrobetaine |
|-------------------------------------------|---------------|---------------|---------------|-----------------|-----------------------|------------------|------------------|--------------------|--------------------------|
| Shannon Diversity Index                   | -0.088        | 0.022         | <b>-.286*</b> | -0.136          | 0.042                 | -0.087           | 0.066            | 0.086              | -0.083                   |
| Inverse Simpson Index                     | -0.045        | 0.014         | -0.203        | -0.078          | 0.049                 | -0.041           | 0.069            | 0.053              | -0.069                   |
| θ <sub>YC</sub> Distances                 | -0.121        | -0.031        | -0.171        | -0.159          | -0.087                | -0.136           | -0.036           | 0.025              | -0.05                    |
| Actinobacteria                            | -0.047        | 0.052         | -0.083        | -0.078          | -0.029                | -0.094           | -0.015           | 0.027              | -0.06                    |
| Bacteroidetes                             | 0.118         | -0.051        | -0.043        | 0.013           | -0.078                | 0.211            | 0.19             | 0.068              | 0.202                    |
| Firmicutes                                | -0.009        | 0.043         | -0.058        | -0.009          | 0.105                 | -0.05            | 0.012            | 0.024              | -0.054                   |
| Proteobacteria                            | 0.004         | 0.041         | 0.085         | 0.056           | 0.044                 | -0.044           | -0.075           | -0.097             | -0.036                   |
| <i>Verrucomicrobia</i>                    | <b>-.230*</b> | <b>-.249*</b> | <b>-.263*</b> | -0.183          | -0.159                | -0.084           | -0.109           | -0.058             | -0.105                   |
| Firmicutes:Bacteroidetes                  | -0.093        | 0.015         | -0.089        | -0.034          | 0.103                 | -0.16            | -0.087           | -0.028             | -0.175                   |
| <i>Prevotella:Bacteroides</i>             | 0.023         | 0.119         | -0.102        | -0.139          | -0.1                  | 0.048            | 0.053            | 0.119              | 0.124                    |
| <i>Prevotella</i>                         | 0.016         | 0.14          | -0.082        | -0.082          | -0.121                | 0.034            | 0.04             | 0.077              | 0.14                     |
| <i>ClostridiumXIVa</i>                    | -0.193        | -0.194        | -0.115        | -0.054          | -0.158                | 0.003            | -0.08            | -0.131             | -0.003                   |
| <i>Eubacterium</i>                        | -0.132        | 0.097         | -0.109        | -0.072          | -0.04                 | -0.163           | -0.085           | 0.001              | -0.024                   |
| <i>Desulfovibrio</i>                      | -0.032        | 0.071         | -0.015        | 0.107           | -0.089                | -0.06            | -0.032           | -0.132             | 0.019                    |
| <i>Akkermansia mucinophilia</i>           | <b>-.231*</b> | <b>-.248*</b> | <b>-.262*</b> | -0.182          | -0.158                | -0.085           | -0.11            | -0.059             | -0.106                   |

## SUPPLEMENTAL FIGURES

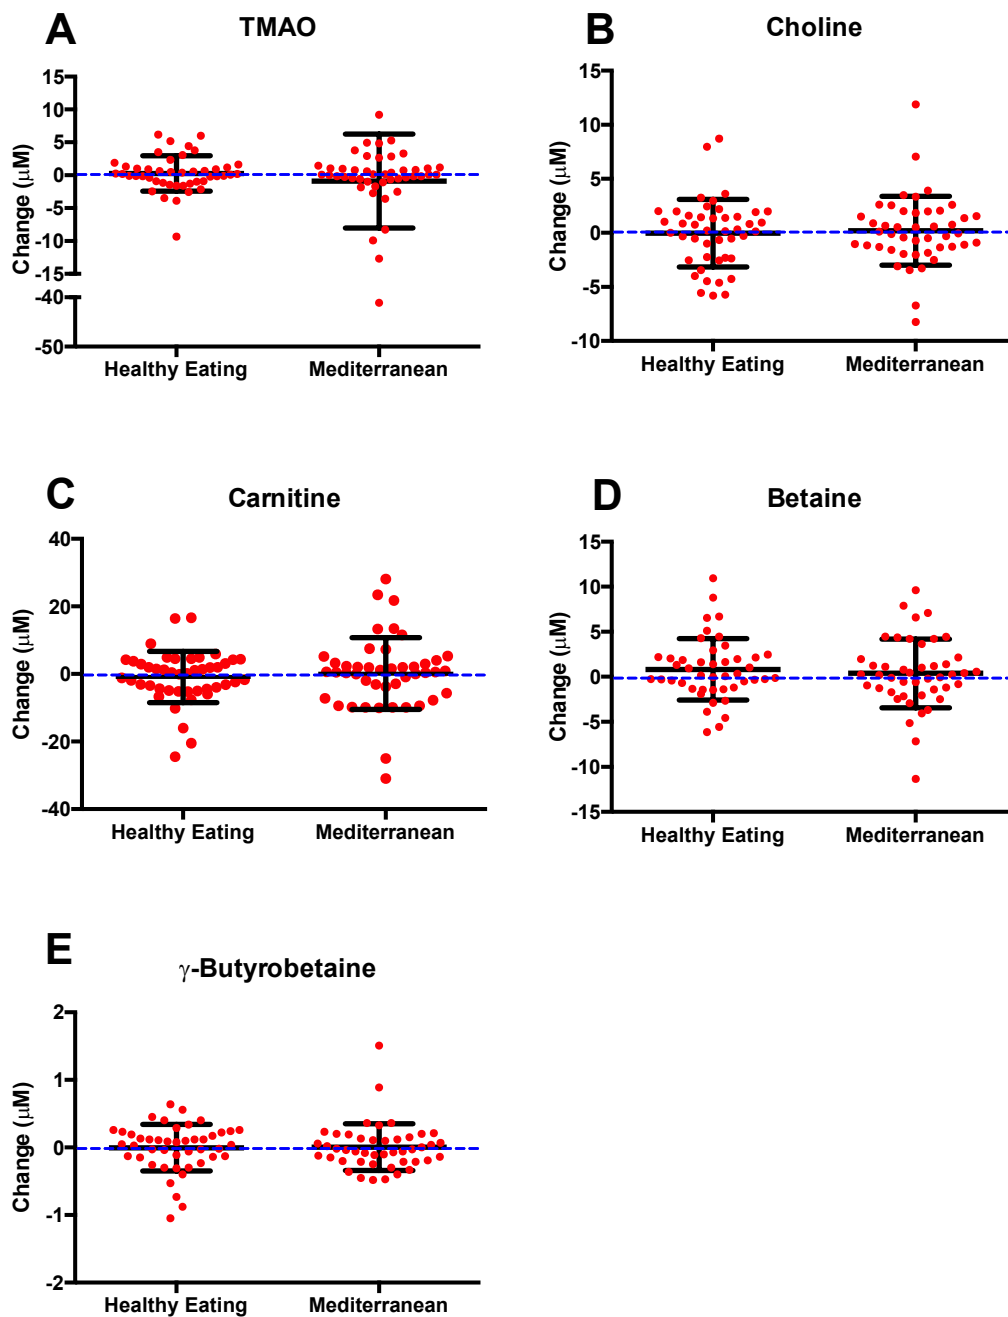

**Figure S1.** Absolute changes in fasting serum levels of TMAO (A), choline (B), carnitine (C), betaine (D) and  $\gamma$ -butyrobetaine (E) over 6 months of each respective intervention [changes were calculated as (concentration at 6 months – concentration at baseline)]. Lines represent mean  $\pm$  SD. Note: subjects who did not complete the intervention were excluded from this calculation.

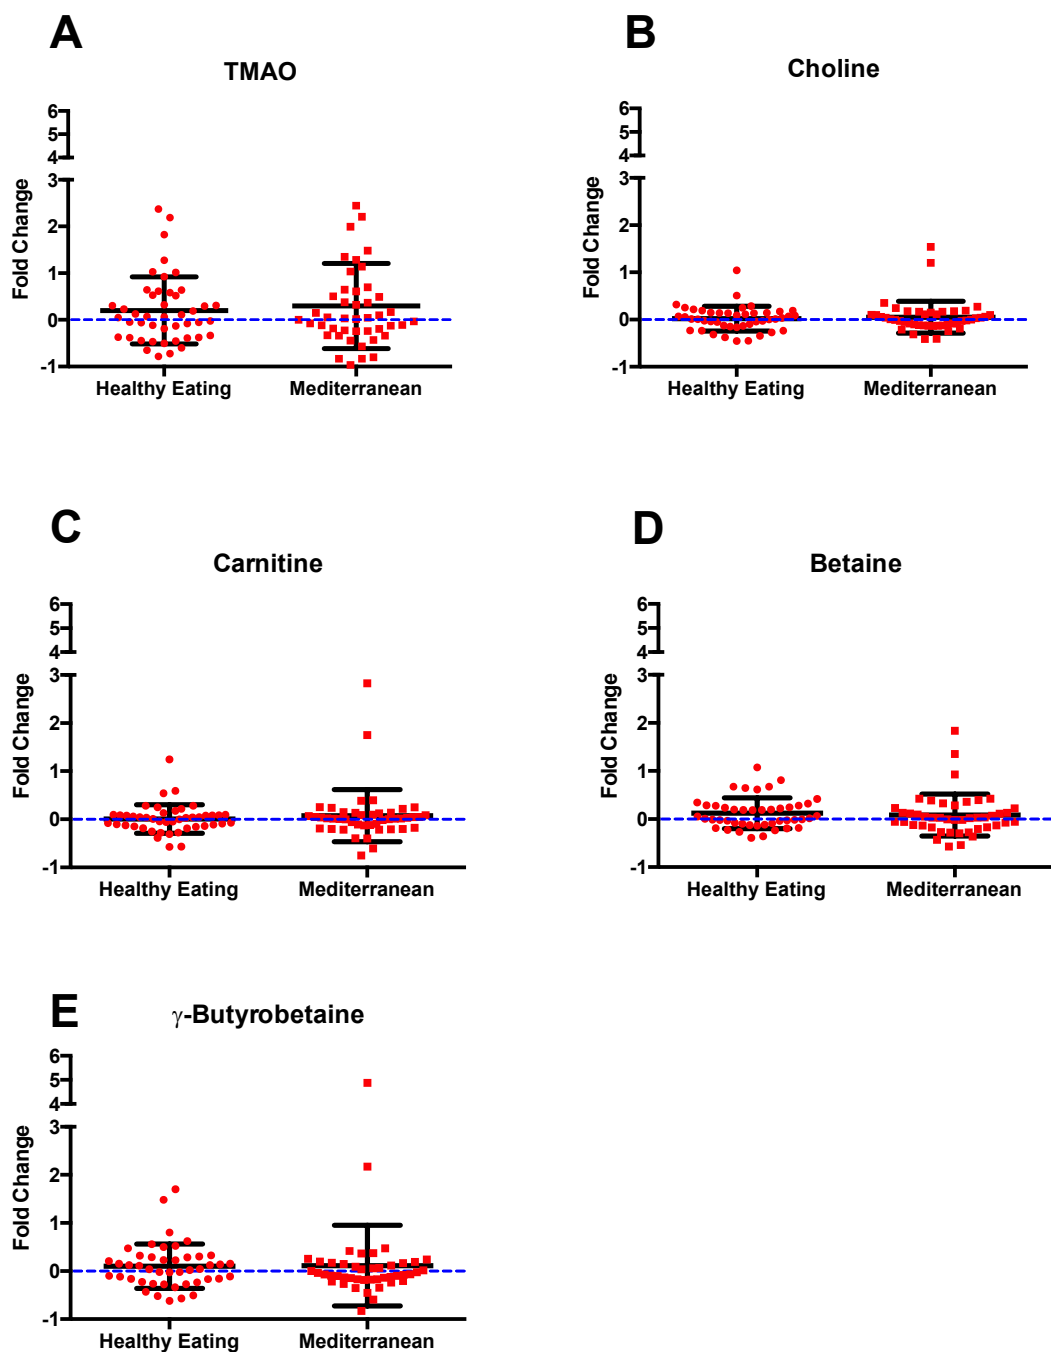

**Figure S2.** Fold changes in fasting serum levels of TMAO (A), choline (B), carnitine (C), betaine (D) and  $\gamma$ -butyrobetaine (E) over 6 months of each respective intervention [fold changes were calculated as (concentration at 6 months) / concentration at baseline]. Lines represent mean  $\pm$  SD. Subjects who did not complete the intervention are excluded from this calculation. Note: scales are the same for all compounds in order to facilitate comparisons.
